# Supplementary material for: Dietary Approaches to Stop Hypertension (DASH) Score and Its Association with Sleep Quality in a National Survey of Middle-Aged and Older Men and Women
Source: MDPI journal article supplement (doi:10.3390/nu12051510), 2020-05-22
Supplement: s1 [file s1]

### **Supplementary File S1. Sleep Quality Index Variables**

(1) How much sleep do you get (hours): How much sleep do you get (hours)? The range is 1-11 and is truncated at 12 or more. Response of "I don't know" or "refused" were considered missing:

**sld010h**

(2) How long to fall asleep (min.), 0-50, 60 or more=60: **sld020m**

(3) How often do you snore?, 4-point likert scale: 0=never, 1=Rarely (1-2 nights/week), 2=Occasionally (3-4 nights/week), 3=Frequently (5 or more nights/week): **slq030**

(4) How often do you snort/stop breathing? 4-point likert scale: 0=never, 1=Rarely (1-2 nights/week), 2=Occasionally (3-4 nights/week), 3=Frequently (5 or more nights/week): **slq040**

(5) How often do you have trouble falling asleep? 5-point likert scale: 0=Never, 1=Rarely (1 time a month), 2=Sometimes (2-4 times a month), 3=Often (5-15 times a month), 4=Almost always (16-30 times a month) : **slq080**

(6) How often do you wake up during the night? 5-point likert scale: 0=Never, 1=Rarely (1 time a month), 2=Sometimes (2-4 times a month), 3=Often (5-15 times a month), 4=Almost always (16-30 times a month) : **slq090**

(7) How often do you wake up too early in the morning? 5-point likert scale: 0=Never, 1=Rarely (1 time a month), 2=Sometimes (2-4 times a month), 3=Often (5-15 times a month), 4=Almost always (16-30 times a month) : **slq100**

(8) How often do you feel unrested during the day? 5-point likert scale: 0=Never, 1=Rarely (1 time a month), 2=Sometimes (2-4 times a month), 3=Often (5-15 times a month), 4=Almost always (16-30 times a month) : **slq110**

(9) How often do you feel overly sleepy during the day? 5-point likert scale: 0=Never, 1=Rarely (1 time a month), 2=Sometimes (2-4 times a month), 3=Often (5-15 times a month), 4=Almost always (16-30 times a month) : **slq120**

(10) How often did you not get enough sleep? 5-point likert scale: 0=Never, 1=Rarely (1 time a month), 2=Sometimes (2-4 times a month), 3=Often (5-15 times a month), 4=Almost always (16-30 times a month) : **slq130**

(11) How often do you take pills to help you sleep? 5-point likert scale: 0=Never, 1=Rarely (1 time a month), 2=Sometimes (2-4 times a month), 3=Often (5-15 times a month), 4=Almost always (16-30 times a month) : **slq140**

(12) How often do you have leg jerks while sleeping? 5-point likert scale: 0=Never, 1=Rarely (1 time a month), 2=Sometimes (2-4 times a month), 3=Often (5-15 times a month), 4=Almost always (16-30 times a month) : **slq150**

(13) How often do you have leg cramps while sleeping? 5-point likert scale: 0=Never, 1=Rarely (1 time a month), 2=Sometimes (2-4 times a month), 3=Often (5-15 times a month), 4=Almost always (16-30 times a month) : **slq160**

(14) Do you have difficulty concentrating when tired? 5-point likert scale: 1=Don't do this activity for other reasons, 2=no difficulty, 3=Yes, a little difficulty, 4=Yes, moderate difficulty, 5=yes, extreme difficulty: **slq170**

(15) Do you have difficulty remembering when tired? 5-point likert scale: 1=Don't do this activity for other reasons, 2=no difficulty, 3=Yes, a little difficulty, 4=Yes, moderate difficulty, 5=yes, extreme difficulty: **slq180**

(16) Do you have difficulty eating when tired? 5-point likert scale: 1=Don't do this activity for other reasons, 2=no difficulty, 3=Yes, a little difficulty, 4=Yes, moderate difficulty, 5=yes, extreme difficulty: **slq190**

(17) Do you have difficulty with a hobby when tired? 5-point likert scale: 1=Don't do this activity for other reasons, 2=no difficulty, 3=Yes, a little difficulty, 4=Yes, moderate difficulty, 5=yes, extreme difficulty: **slq200**

(18) Do you have difficulty getting things done when tired? 5-point likert scale: 1=Don't do this activity for other reasons, 2=no difficulty, 3=Yes, a little difficulty, 4=Yes, moderate difficulty, 5=yes, extreme difficulty: **slq210**

(19) Do you have difficulty with finances when tired? 5-point likert scale: 1=Don't do this activity for other reasons, 2=no difficulty, 3=Yes, a little difficulty, 4=Yes, moderate difficulty, 5=yes, extreme difficulty: **slq220**

(20) Do you have difficulty with work when tired? 5-point likert scale: 1=Don't do this activity for other reasons, 2=no difficulty, 3=Yes, a little difficulty, 4=Yes, moderate difficulty, 5=yes, extreme difficulty: **slq230**

(21) Do you have difficulty using the phone when tired? 5-point likert scale: 1=Don't do this activity for other reasons, 2=no difficulty, 3=Yes, a little difficulty, 4=Yes, moderate difficulty, 5=yes, extreme difficulty: **slq240**

**Supplementary File S2. Reduced factor analysis and factor loading plot**

**Reduced and rotated factor analysis results with 2-factor extraction:**

**factor loadings/uniqueness (N = 3941)**

|         | <b>Factor 1</b>                             | <b>Factor 2</b>                                   | <b>Uniqueness</b> |
|---------|---------------------------------------------|---------------------------------------------------|-------------------|
|         | <b>Sleepiness and sleep<br/>disturbance</b> | <b>Poor sleep-related<br/>daytime dysfunction</b> |                   |
| sld020m | <b>0.46</b>                                 | -0.03                                             | 0.79              |
| slq080  | <b>0.71</b>                                 | 0.06                                              | 0.49              |
| slq090  | <b>0.75</b>                                 | 0.09                                              | 0.44              |
| slq100  | <b>0.66</b>                                 | 0.08                                              | 0.56              |
| slq110  | <b>0.63</b>                                 | 0.29                                              | 0.51              |
| slq120  | <b>0.60</b>                                 | 0.34                                              | 0.53              |
| slq130  | <b>0.63</b>                                 | 0.24                                              | 0.54              |
| slq170  | 0.28                                        | <b>0.64</b>                                       | 0.51              |
| slq180  | 0.25                                        | <b>0.58</b>                                       | 0.60              |
| slq190  | 0.09                                        | <b>0.42</b>                                       | 0.81              |
| slq200  | 0.15                                        | <b>0.55</b>                                       | 0.67              |
| slq210  | 0.13                                        | <b>0.58</b>                                       | 0.64              |
| slq220  | 0.10                                        | <b>0.60</b>                                       | 0.63              |
| slq230  | 0.01                                        | <b>0.46</b>                                       | 0.79              |

Bolded factor loadings are >0.40 and considered significant. Factors are labelled based on highest loadings on measured items.

## Factor loading plot

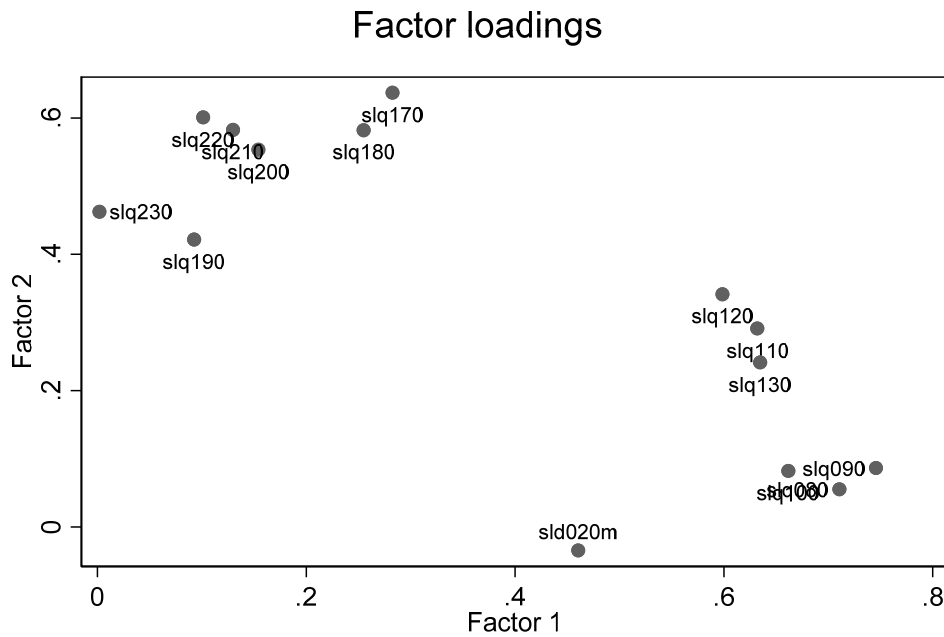

Rotation: orthogonal varimax  
Method: principal factors

## Supplementary File S3. DASH diet scoring system

| Nutrient            | DASH diet nutrient composition <sup>a</sup> | DASH score target (1) | Intermediate target (0.5) |
|---------------------|---------------------------------------------|-----------------------|---------------------------|
| Saturated fat       | 6% of energy                                | 6% of energy          | 11% of energy             |
| Total fat           | 27% of energy                               | 27% of energy         | 32% of energy             |
| Protein             | 18% of energy                               | 18% of energy         | 16.5% of energy           |
| Cholesterol         | 150 mg                                      | 71.4 mg/1000 kcal     | 107.1 mg/1000 kcal        |
| Fiber               | 31 g                                        | 14.8 g/1000 kcal      | 9.5 g/1000 kcal           |
| Magnesium           | 500 mg                                      | 238 mg/1000 kcal      | 158 mg/1000 kcal          |
| Calcium             | 1240 mg                                     | 590 mg/1000 kcal      | 402 mg/1000 kcal          |
| Potassium           | 4700 mg                                     | 2238 mg/1000 kcal     | 1534 mg/1000 kcal         |
| Sodium <sup>b</sup> | 2400 mg                                     | 1143 mg/1000 kcal     | 1286 mg/1000 kcal         |

**Abbreviation:** DASH, Dietary Approaches to Stop Hypertension trial.

<sup>a</sup> Based on a 2100-kcal diet.

<sup>b</sup> Sodium target based on the Sixth Report of the Joint National Committee on Prevention, Detection, Evaluation, and Treatment of High Blood Pressure recommendations.

**Source:[1]**

1. Mellen PB, Gao SK, Vitolins MZ, Goff DC, Jr. Deteriorating dietary habits among adults with hypertension: DASH dietary accordance, NHANES 1988-1994 and 1999-2004. *Archives of internal medicine* 2008;168:308-14.

**Supplementary File S4. Allostatic Load Score**

|                                    | <b>1</b>                       | <b>0.5</b>                           | <b>0</b>                       |
|------------------------------------|--------------------------------|--------------------------------------|--------------------------------|
| <b>SBP</b>                         | ≥150 mmHg                      | 120 to <150 mmHg                     | <120 mmHg                      |
| <b>DBP</b>                         | ≥90 mmHg                       | 80 to <90 mmHg                       | <80 mmHg                       |
| <b>BMI</b>                         | ≥30 kg/m <sup>2</sup>          | 25 to <30 kg/m <sup>2</sup>          | <25 kg/m <sup>2</sup>          |
| <b>HbA1c</b>                       | ≥6.5%                          | 5.7% to <6.5%                        | <5.7%                          |
| <b>Total cholesterol</b>           | ≥240 mg/dL                     | 200 to <240 mg/dL                    | <200 mg/dL                     |
| <b>HDL cholesterol</b>             | <40 mg/dL                      | 40 to <60 mg/dL                      | ≥60 mg/dL                      |
| <b>Total/HDL cholesterol ratio</b> | ≥6                             | 5 to <6                              | <5                             |
| <b>CRP</b>                         | ≥3 mg/L                        | 1 to <3 mg/L                         | <1 mg/L                        |
| <b>Albumin</b>                     | <3.0 µg/mL                     | 3.0 to <3.8 µg/mL                    | ≥3.8 µg/mL                     |
| <b>Creatinine clearance</b>        | <30 mL/min/1.73 m <sup>2</sup> | 30 to <60 mL/min/1.73 m <sup>2</sup> | ≥60 mL/min/1.73 m <sup>2</sup> |

**Sources:[2]**

1. Mellen, P.B.; Gao, S.K.; Vitolins, M.Z.; Goff, D.C., Jr. Deteriorating dietary habits among adults with hypertension: DASH dietary accordance, NHANES 1988-1994 and 1999-2004. *Archives of internal medicine* **2008**, *168*, 308-314, doi:10.1001/archinternmed.2007.119.
2. Rodriguez, E.J.; Livaudais-Toman, J.; Gregorich, S.E.; Jackson, J.S.; Napoles, A.M.; Perez-Stable, E.J. Relationships between allostatic load, unhealthy behaviors, and depressive disorder in U.S. adults, 2005-2012 NHANES. *Preventive medicine* **2018**, *110*, 9-15, doi:10.1016/j.ypmed.2018.02.002.

**TABLE S1.** Study sample characteristics by age group, NHANES 2005-2008

|                                                                 | Age 30-59 |       | Age60+ |       | P <sub>age</sub> |
|-----------------------------------------------------------------|-----------|-------|--------|-------|------------------|
|                                                                 | Mean/%    | (SE)  | Mean/% | (SE)  |                  |
| <b>Age (years):</b>                                             |           |       |        |       | <0.001           |
| <i>Mean ± SEM</i>                                               | 44.2      | 0.3   | 68.5   | 0.3   |                  |
| <b>Sex:</b>                                                     |           |       |        |       | <0.001           |
| Male                                                            | 50.0      | 0.0   | 41.1   | 0.0   |                  |
| Female                                                          | 50.0      | 0.0   | 58.9   | 0.0   |                  |
| <b>Race/Ethnicity:</b>                                          |           |       |        |       | <0.001           |
| Mexican American                                                | 7.9       | 0.01  | 4.1    | 0.01  |                  |
| Other Hispanic                                                  | 3.8       | 0.01  | 2.9    | 0.01  |                  |
| Non-Hispanic White                                              | 73.3      | 0.02  | 83.6   | 0.02  |                  |
| Non-Hispanic Black                                              | 9.4       | 0.01  | 7.1    | 0.01  |                  |
| Other                                                           | 5.6       | 0.01  | 2.4    | 0.01  |                  |
| <b>Education:</b>                                               |           |       |        |       | <0.001           |
| < Less Than 9th Grade                                           | 3.683     | 0.004 | 10.693 | 0.011 |                  |
| 9-11th Grade                                                    | 10.550    | 0.012 | 12.891 | 0.013 |                  |
| High School Grad/GED or Equivalent                              | 23.110    | 0.011 | 28.489 | 0.012 |                  |
| Some College or AA degree                                       | 31.252    | 0.012 | 23.470 | 0.015 |                  |
| College Graduate or above                                       | 31.405    | 0.022 | 24.457 | 0.019 |                  |
| <b>Marital status:</b>                                          |           |       |        |       | <0.001           |
| Married/Living with partner                                     | 74.257    | 0.016 | 65.823 | 0.021 |                  |
| Other                                                           | 25.743    | 0.016 | 34.177 | 0.021 |                  |
| <b>Poverty-income ratio:</b>                                    |           |       |        |       | <0.001           |
| < 100%                                                          | 9.201     | 0.010 | 7.071  | 0.008 |                  |
| 100%-<200%                                                      | 14.476    | 0.011 | 24.701 | 0.014 |                  |
| ≥ 200%                                                          | 76.323    | 0.018 | 68.228 | 0.018 |                  |
| <b>Smoking status:</b>                                          |           |       |        |       | <0.001           |
| Never smoker                                                    | 54.605    | 0.013 | 46.283 | 0.018 |                  |
| Ex-smoker                                                       | 22.371    | 0.009 | 41.046 | 0.018 |                  |
| Current smoker                                                  | 23.024    | 0.014 | 12.671 | 0.013 |                  |
| <b>Alcohol consumption</b><br>(≥ 12 glasses in past 12 months): |           |       |        |       | <0.001           |
| Yes                                                             | 78.695    | 0.015 | 67.019 | 0.019 |                  |
| No                                                              | 21.305    | 0.015 | 32.980 | 0.019 |                  |
| <b>Physical activity:</b>                                       |           |       |        |       | 0.025            |
| Yes                                                             | 45.773    | 0.026 | 38.184 | 0.032 |                  |
| No                                                              | 54.227    | 0.026 | 61.816 | 0.032 |                  |
| <b>Body mass index (kg/m²):</b>                                 |           |       |        |       | 0.35             |
| <i>Mean ± SEM</i>                                               | 28.941    | 0.229 | 28.671 | 0.211 |                  |
| <b>Self-rated health:</b>                                       |           |       |        | 0.013 |                  |
| Excellent/Very good/Good                                        | 87.801    | 0.009 | 84.924 |       |                  |
| Fair/Poor                                                       | 12.199    | 0.009 | 15.076 |       |                  |
| <b>Allostatic load</b>                                          |           |       |        |       |                  |

|                                                             |       |       |       |       |        |
|-------------------------------------------------------------|-------|-------|-------|-------|--------|
| <i>Mean ± SEM</i>                                           | 2.708 | 0.041 | 3.291 | 0.049 | <0.001 |
| <b>DASH diet total score</b>                                |       |       |       |       |        |
| <i>Mean ± SEM</i>                                           | 2.065 | 0.040 | 2.494 | 0.062 | <0.001 |
| <b>DASH diet component 1:<br/>Saturated fat</b>             |       |       |       |       |        |
| <i>Mean ± SEM</i>                                           | 0.251 | 0.009 | 0.271 | 0.010 | 0.089  |
| <b>DASH diet component 2: Fat</b>                           |       |       |       |       |        |
| <i>Mean ± SEM</i>                                           | 0.265 | 0.008 | 0.288 | 0.018 | 0.051  |
| <b>DASH diet component 3:<br/>Protein</b>                   |       |       |       |       |        |
| <i>Mean ± SEM</i>                                           | 0.346 | 0.012 | 0.354 | 0.017 | 0.65   |
| <b>DASH diet component 4:<br/>Cholesterol</b>               |       |       |       |       |        |
| <i>Mean ± SEM</i>                                           | 0.266 | 0.009 | 0.275 | 0.010 | 0.54   |
| <b>DASH diet component 5: Fiber</b>                         |       |       |       |       |        |
| <i>Mean ± SEM</i>                                           | 0.143 | 0.008 | 0.248 | 0.013 | <0.001 |
| <b>DASH diet component 6:<br/>Magnesium</b>                 |       |       |       |       |        |
| <i>Mean ± SEM</i>                                           | 0.177 | 0.007 | 0.259 | 0.015 | <0.001 |
| <b>DASH diet component 7:<br/>Calcium</b>                   |       |       |       |       |        |
| <i>Mean ± SEM</i>                                           | 0.360 | 0.010 | 0.431 | 0.013 | <0.001 |
| <b>DASH diet component 8:<br/>Potassium</b>                 |       |       |       |       |        |
| <i>Mean ± SEM</i>                                           | 0.133 | 0.005 | 0.239 | 0.010 | <0.001 |
| <b>DASH diet component 9:<br/>Sodium</b>                    |       |       |       |       |        |
| <i>Mean ± SEM</i>                                           | 0.122 | 0.007 | 0.127 | 0.013 | 0.74   |
| <b>Sleep quality measures</b>                               |       |       |       |       |        |
| <b>Factor 1: Sleepiness and<br/>sleep disturbance</b>       |       |       |       |       |        |
| <i>Mean ± SEM</i>                                           | 0.070 | 0.024 | -.000 | 0.030 | 0.095  |
| <b>Factor 2: Poor sleep-related<br/>daytime dysfunction</b> |       |       |       |       |        |
| <i>Mean ± SEM</i>                                           | 0.084 | 0.018 | -.265 | 0.031 | <0.001 |

*Abbreviations:* DASH=Dietary Approaches to Stop Hypertension; nc=not computed; NHANES=National Health and Nutrition Examination Surveys; SEM=Standard Error of the Mean.

N=2,683 among the 30-59y age group, N=1,258 among the 60+ age group.



**TABLE S2.** DASH total score as predictor of sleep quality measures, stratified by age group: multiple linear regression models, NHANES 2005-2008

|         | Age30-59<br>N=2,683                                         |       |                   | Age 60+<br>N=1,258                                          |       |                   |                       |
|---------|-------------------------------------------------------------|-------|-------------------|-------------------------------------------------------------|-------|-------------------|-----------------------|
|         | <i>Factor 1: Sleepiness and<br/>sleep disturbance</i>       |       |                   | <i>Factor 1: Sleepiness and<br/>sleep disturbance</i>       |       |                   |                       |
|         | $\beta$                                                     | (SEE) | P <sub>wald</sub> | $\beta$                                                     | (SEE) | P <sub>wald</sub> | P <sub>age×DASH</sub> |
| Model 1 | -0.023                                                      | 0.017 | 0.19              | -0.028                                                      | 0.017 | 0.11              | 0.72                  |
| Model 2 | -0.010                                                      | 0.017 | 0.56              | -0.030                                                      | 0.018 | 0.11              | 0.55                  |
| Model 3 | -0.007                                                      | 0.018 | 0.71              | -0.028                                                      | 0.018 | 0.13              | 0.56                  |
|         | <i>Factor 2: Poor sleep-related<br/>daytime dysfunction</i> |       |                   | <i>Factor 2: Poor sleep-related<br/>daytime dysfunction</i> |       |                   |                       |
|         | $\beta$                                                     | (SEE) | P <sub>wald</sub> | $\beta$                                                     | (SEE) | P <sub>wald</sub> | P <sub>age×DASH</sub> |
| Model 1 | -0.023                                                      | 0.013 | 0.088             | -0.096                                                      | 0.014 | 0.51              | 0.75                  |
| Model 2 | -0.022                                                      | 0.013 | 0.10              | -0.005                                                      | 0.016 | 0.78              | 0.78                  |
| Model 3 | -0.020                                                      | 0.014 | 0.18              | -0.002                                                      | 0.016 | 0.92              | 0.68                  |

*Abbreviations:* DASH=Dietary Approaches to Stop Hypertension; NHANES=National Health and Nutrition Examination Surveys ; SEE=Standard Error of the Estimate.

Model 1 (age); Model 2 (age, sex, race/ethnicity, marital status, poverty income ratio and education); Model 3 (Model 2 + smoking, alcohol use, physical activity, self-rated health, BMI and ALI).

**TABLE S3.** DASH component scores as predictors of sleep quality measures, stratified by age group: multiple linear regression models, NHANES 2005-2008

|                                    | Age30-59                                         |       |                   | Age 60+                                          |       |                   | $P_{\text{age} \times \text{DASH}}$ |
|------------------------------------|--------------------------------------------------|-------|-------------------|--------------------------------------------------|-------|-------------------|-------------------------------------|
|                                    | <i>Factor 1 Sleepiness and sleep disturbance</i> |       |                   | <i>Factor 1 Sleepiness and sleep disturbance</i> |       |                   |                                     |
|                                    | $\beta$                                          | (SEE) | $P_{\text{wald}}$ | $\beta$                                          | (SEE) | $P_{\text{wald}}$ |                                     |
| DASH component 1:<br>Saturated fat |                                                  |       |                   |                                                  |       |                   |                                     |
| Model 1                            | -0.013                                           | 0.080 | 0.13              | -0.043                                           | 0.012 | 0.72              | 0.69                                |
| Model 2                            | -0.057                                           | 0.078 | 0.47              | -0.040                                           | 0.128 | 0.76              | 0.78                                |
| Model 3                            | -0.040                                           | 0.079 | 0.62              | -0.073                                           | 0.134 | 0.59              | 0.96                                |
| DASH component 2:<br>Total fat     |                                                  |       |                   |                                                  |       |                   |                                     |
| Model 1                            | +0.002                                           | 0.059 | 0.97              | -0.012                                           | 0.070 | 0.092             | 0.085                               |
| Model 2                            | +0.036                                           | 0.057 | 0.53              | -0.013                                           | 0.067 | 0.066             | 0.077                               |
| Model 3                            | +0.044                                           | 0.058 | 0.45              | -0.013                                           | 0.071 | 0.068             | 0.052                               |
| DASH component 3:<br>Protein       |                                                  |       |                   |                                                  |       |                   |                                     |
| Model 1                            | -0.038                                           | 0.041 | 0.36              | -0.010                                           | 0.067 | 0.14              | 0.50                                |
| Model 2                            | -0.019                                           | 0.042 | 0.65              | -0.010                                           | 0.067 | 0.13              | 0.46                                |
| Model 3                            | -0.023                                           | 0.043 | 0.64              | -0.095                                           | 0.066 | 0.16              | 0.50                                |
| DASH component 4:<br>Cholesterol   |                                                  |       |                   |                                                  |       |                   |                                     |
| Model 1                            | +0.024                                           | 0.046 | 0.60              | +0.018                                           | 0.092 | 0.85              | 0.89                                |
| Model 2                            | +0.020                                           | 0.048 | 0.69              | +0.002                                           | 0.086 | 0.98              | 0.89                                |
| Model 3                            | +0.018                                           | 0.050 | 0.72              | +0.006                                           | 0.090 | 0.95              | 0.97                                |
| DASH component 5:<br>Fiber         |                                                  |       |                   |                                                  |       |                   |                                     |
| Model 1                            | -0.205                                           | 0.083 | 0.019             | -0.115                                           | 0.093 | 0.226             | 0.50                                |
| Model 2                            | -0.129                                           | 0.086 | 0.14              | -0.110                                           | 0.10  | 0.276             | 0.69                                |
| Model 3                            | -0.106                                           | 0.086 | 0.23              | -0.124                                           | 0.11  | 0.246             | 0.76                                |

|                                 |                                                        |       |                   |                                                        |       |                   |                       |
|---------------------------------|--------------------------------------------------------|-------|-------------------|--------------------------------------------------------|-------|-------------------|-----------------------|
| DASH component 6: Magnesium     |                                                        |       |                   |                                                        |       |                   |                       |
| Model 1                         | -0.047                                                 | 0.080 | 0.019             | -0.101                                                 | 0.091 | 0.28              | 0.69                  |
| Model 2                         | 0.007                                                  | 0.083 | 0.94              | -0.089                                                 | 0.096 | 0.36              | 0.54                  |
| Model 3                         | 0.018                                                  | 0.085 | 0.83              | -0.060                                                 | 0.096 | 0.54              | 0.61                  |
| DASH component 7: Calcium       |                                                        |       |                   |                                                        |       |                   |                       |
| Model 1                         | -0.055                                                 | 0.059 | 0.33              | +0.010                                                 | 0.081 | 0.90              | 0.42                  |
| Model 2                         | -0.050                                                 | 0.063 | 0.44              | +0.010                                                 | 0.096 | 0.91              | 0.53                  |
| Model 3                         | -0.032                                                 | 0.061 | 0.61              | 0.007                                                  | 0.086 | 0.94              | 0.57                  |
| DASH component 8: Potassium     |                                                        |       |                   |                                                        |       |                   |                       |
| Model 1                         | -0.225                                                 | 0.103 | 0.036             | -0.109                                                 | 0.098 | 0.27              | 0.34                  |
| Model 2                         | -0.211                                                 | 0.103 | 0.049             | -0.121                                                 | 0.100 | 0.23              | 0.41                  |
| Model 3                         | -0.193                                                 | 0.061 | 0.605             | -0.095                                                 | 0.102 | 0.36              | 0.33                  |
| DASH component 9: Sodium        |                                                        |       |                   |                                                        |       |                   |                       |
| Model 1                         | +0.078                                                 | 0.074 | 0.30              | -0.031                                                 | 0.088 | 0.73              | 0.20                  |
| Model 2                         | +0.092                                                 | 0.073 | 0.21              | -0.033                                                 | 0.089 | 0.71              | 0.23                  |
| Model 3                         | +0.085                                                 | 0.077 | 0.27              | -0.001                                                 | 0.092 | 1.00              | 0.37                  |
|                                 | <i>Factor 2 Poor sleep-related daytime dysfunction</i> |       |                   | <i>Factor 2 Poor sleep-related daytime dysfunction</i> |       |                   |                       |
| DASH component 1: Saturated fat | $\beta$                                                | (SEE) | P <sub>wald</sub> | $\beta$                                                | (SEE) | P <sub>wald</sub> | P <sub>age×DASH</sub> |
| Model 1                         | -0.105                                                 | 0.061 | 0.095             | -0.012                                                 | 0.068 | 0.87              | 0.49                  |
| Model 2                         | -0.103                                                 | 0.066 | 0.13              | -0.000                                                 | 0.073 | 1.00              | 0.51                  |
| Model 3                         | -0.082                                                 | 0.070 | 0.25              | -0.014                                                 | 0.075 | 0.85              | 0.69                  |
| DASH component 2: Total fat     |                                                        |       |                   |                                                        |       |                   |                       |
| Model 1                         | -0.033                                                 | 0.043 | 0.45              | -0.067                                                 | 0.053 | 0.21              | 0.50                  |
| Model 2                         | -0.026                                                 | 0.044 | 0.56              | -0.056                                                 | 0.053 | 0.30              | 0.40                  |
| Model 3                         | -0.020                                                 | 0.046 | 0.66              | -0.053                                                 | 0.052 | 0.31              | 0.47                  |

|              |        |       |       |         |       |       |       |
|--------------|--------|-------|-------|---------|-------|-------|-------|
| DASH         |        |       |       |         |       |       |       |
| component 3: |        |       |       |         |       |       |       |
| Protein      |        |       |       |         |       |       |       |
| Model 1      | -0.053 | 0.057 | 0.36  | -0.043  | 0.065 | 0.51  | 0.76  |
| Model 2      | -0.048 | 0.058 | 0.41  | -0.039  | 0.064 | 0.55  | 0.76  |
| Model 3      | -0.062 | 0.057 | 0.29  | -0.030  | 0.060 | 0.62  | 0.62  |
| DASH         |        |       |       |         |       |       |       |
| component 4: |        |       |       |         |       |       |       |
| Cholesterol  |        |       |       |         |       |       |       |
| Model 1      | -0.052 | 0.042 | 0.23  | -0.071  | 0.057 | 0.23  | 0.64  |
| Model 2      | -0.049 | 0.042 | 0.26  | -0.063  | 0.053 | 0.25  | 0.67  |
| Model 3      | -0.049 | 0.045 | 0.29  | -0.061  | 0.056 | 0.28  | 0.82  |
| DASH         |        |       |       |         |       |       |       |
| component 5: |        |       |       |         |       |       |       |
| Fiber        |        |       |       |         |       |       |       |
| Model 1      | -0.168 | 0.068 | 0.019 | +0.128  | 0.068 | 0.067 | 0.013 |
| Model 2      | -0.157 | 0.067 | 0.025 | +0.143  | 0.076 | 0.068 | 0.020 |
| Model 3      | -0.136 | 0.070 | 0.062 | +0.146  | 0.081 | 0.082 | 0.030 |
| DASH         |        |       |       |         |       |       |       |
| component 6: |        |       |       |         |       |       |       |
| Magnesium    |        |       |       |         |       |       |       |
| Model 1      | -0.011 | 0.075 | 0.14  | -0.0279 | 0.061 | 0.65  | 0.53  |
| Model 2      | -0.011 | 0.075 | 0.14  | -0.0024 | 0.066 | 0.97  | 0.57  |
| Model 3      | -0.093 | 0.076 | 0.23  | +0.001  | 0.071 | 0.85  | 0.57  |
| DASH         |        |       |       |         |       |       |       |
| component 7: |        |       |       |         |       |       |       |
| Calcium      |        |       |       |         |       |       |       |
| Model 1      | -0.022 | 0.042 | 0.60  | -0.0247 | 0.066 | 0.71  | 0.84  |
| Model 2      | -0.002 | 0.043 | 0.67  | -0.0040 | 0.067 | 0.95  | 0.85  |
| Model 3      | 0.0001 | 0.043 | 0.82  | -0.0009 | 0.066 | 0.99  | 0.83  |
| DASH         |        |       |       |         |       |       |       |
| component 8: |        |       |       |         |       |       |       |
| Potassium    |        |       |       |         |       |       |       |
| Model 1      | -0.039 | 0.102 | 0.71  | -0.025  | 0.048 | 0.64  | 0.84  |
| Model 2      | -0.036 | 0.100 | 0.73  | -0.002  | 0.053 | 0.98  | 0.87  |
| Model 3      | -2.475 | 0.096 | 0.80  | +0.023  | 0.053 | 0.67  | 0.96  |
| DASH         |        |       |       |         |       |       |       |
| component 9: |        |       |       |         |       |       |       |
| Sodium       |        |       |       |         |       |       |       |
| Model 1      | +0.100 | 0.074 | 0.18  | +0.000  | 0.068 | 1.00  | 0.20  |
| Model 2      | +0.087 | 0.074 | 0.25  | -0.216  | 0.063 | 0.97  | 0.19  |

|         |        |       |      |       |       |      |      |
|---------|--------|-------|------|-------|-------|------|------|
| Model 3 | +0.089 | 0.072 | 0.22 | 1.198 | 0.060 | 0.84 | 0.29 |
|---------|--------|-------|------|-------|-------|------|------|

---

*Abbreviations:* DASH=Dietary Approaches to Stop Hypertension; NHANES=National Health and Nutrition Examination Surveys; SEE=Standard Error of the Estimate.

Model 1 (age); Model 2 (age, sex, race/ethnicity, marital status, poverty income ratio and education); Model 3 (Model 2 + smoking, alcohol use, physical activity, self-rated health, BMI and ALI). N=2,683 among the 30-59y age group, N=1,258 among the 60+ age group.
